# Supplementary material for: Large piezoelectric response in ferroelectric/multiferroelectric metal oxyhalide MOX 2 (M = Ti, V and X = F, Cl and Br) monolayers
Source: Royal Society of Chemistry journal article supplement (doi:10.1039/d2nr02761e), 2022-01-01
Supplement: d2nr02761e1.pdf [file d2nr02761e1.pdf]

# Journal Name

## ARTICLE TYPE

Cite this: DOI: 00.0000/xxxxxxxxxx

### Electronic Supplementary Information (ESI): Large Piezoelectric Response in Ferroelectric/ Multiferroelectric Metal Oxyhalide $\text{MOX}_2$ (M = Ti, V and X = F, Cl and Br) Monolayers

Mohammad Noor-A-Alam<sup>\*a</sup> and Michael Nolan<sup>\*a</sup>

Received Date

Accepted Date

DOI: 00.0000/xxxxxxxxxx

## References

- 1 R. Ahammed, N. Jena, A. Rawat, M. K. Mohanta, Dimple and A. De Sarkar, *The Journal of Physical Chemistry C*, 2020, **124**, 21250–21260.
- 2 R. C. Andrew, R. E. Mapasha, A. M. Ukpong and N. Chetty, *Phys. Rev. B*, 2012, **85**, 125428.
- 3 S. L. Dudarev, G. A. Botton, S. Y. Savrasov, C. J. Humphreys and A. P. Sutton, *Phys. Rev. B*, 1998, **57**, 1505–1509.

<sup>a</sup> Tyndall National Institute, Lee Maltings, Dyke Parade, University College Cork, T12R5CP Cork, Ireland

\* Corresponding authors. E-mail: Mohammad Noor-A-Alam (mda.alam@tyndall.ie) and Michael Nolan (michael.nolan@tyndall.ie)

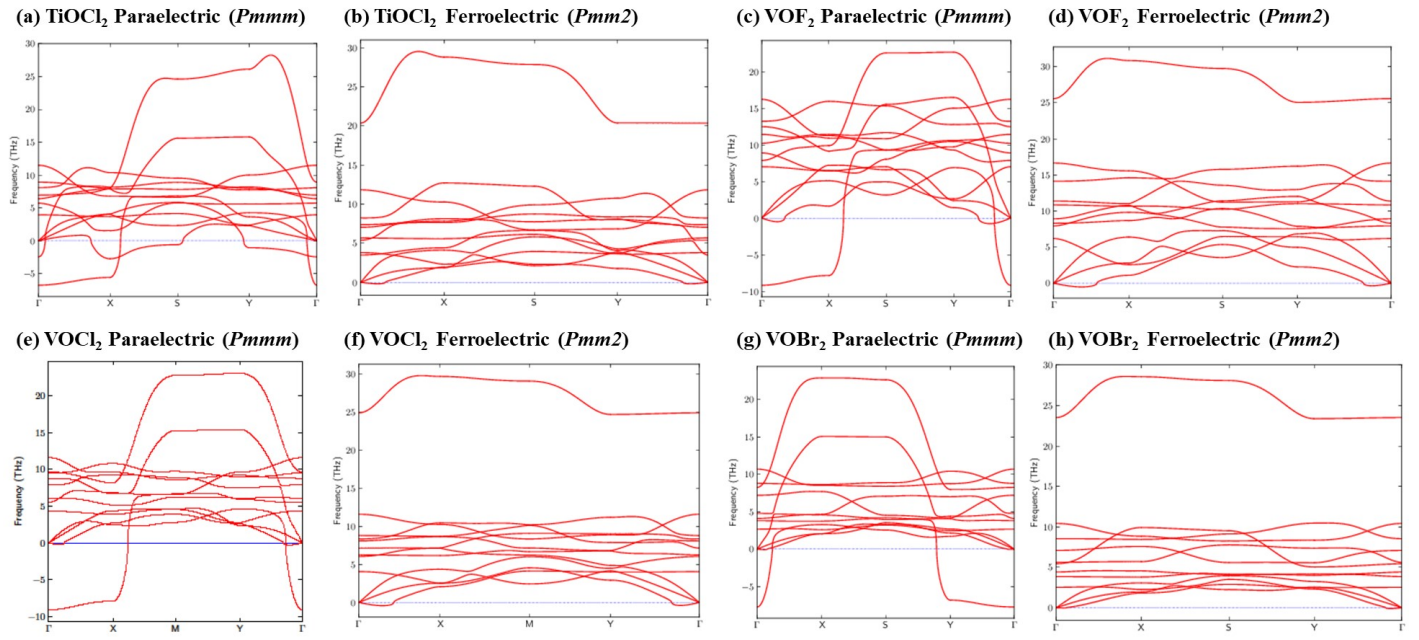

Fig. S1 Phonon band structure of the monolayers in (a) paraelectric (space group:  $Pmmm$ ) and (b) ferroelectric (space group:  $Pmm2$ ) phase. For paraelectric phase, we see an imaginary polar phonon (soft) mode at the  $\Gamma$ -point. Following this soft mode, we obtain ferroelectric phase.

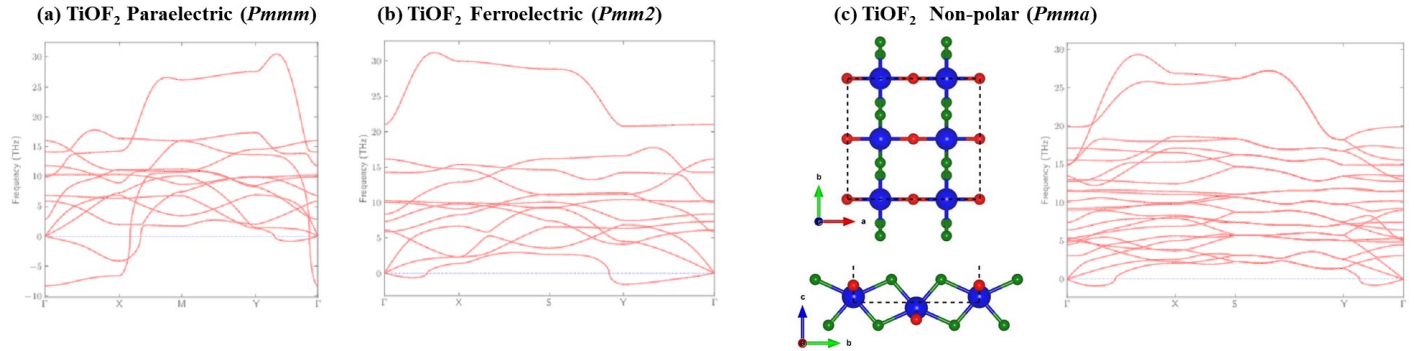

Fig. S2 Phonon band structure of  $\text{TiOF}_2$  monolayer in (a) paraelectric (space group:  $Pmmm$ ) and (b) ferroelectric (space group:  $Pmm2$ ) phase are shown. For paraelectric phase, we see an imaginary polar phonon (soft) mode at the  $\Gamma$ -point. Following this soft mode, we obtain ferroelectric phase, however now there is an imaginary mode the  $Y$ -point, which leads to a new non-polar (space group:  $Pmma$ ) phase (c). Blue, red, and green balls represent Ti, O, and F, respectively. The dashed lines represent the rectangle simulation cells. The “U-shape” soft mode around the  $\Gamma$ -point (c) for non-polar (space group:  $Pmma$ ) phase is due to flexural acoustic mode of 2D materials.

|                        | $Y_x$  | $Y_y$  | $\nu_x$ | $\nu_y$ |
|------------------------|--------|--------|---------|---------|
| $\text{VOF}_2$ (FM)    | 65.652 | 93.454 | 0.156   | 0.222   |
| $\text{VOCl}_2$ (FM)   | 52.458 | 56.844 | 0.150   | 0.162   |
| $\text{VOCl}_2$ (AFM1) | 49.693 | 41.527 | 0.162   | 0.136   |
| $\text{VOBr}_2$ (FM)   | 53.566 | 49.204 | 0.150   | 0.138   |
| $\text{VOBr}_2$ (AFM1) | 52.050 | 39.761 | 0.153   | 0.117   |
| $\text{TiOCl}_2$       | 77.040 | 55.652 | 0.147   | 0.106   |
| $\text{TiOBr}_2$       | 75.953 | 47.247 | 0.144   | 0.089   |

Table S1 Young's modulus along  $a$ -direction ( $Y_x = (C_{11}C_{22} - C_{12}^2)/C_{22}$ ) and  $b$ -direction ( $Y_y = (C_{11}C_{22} - C_{12}^2)/C_{11}$ ) in 2D unit of N/m and Poisson's ratio along  $a$ -direction ( $\nu_x = C_{12}/C_{22}$ ) and  $b$ -direction ( $\nu_y = C_{12}/C_{11}$ ) obtained from elastic constants<sup>1,2</sup>. Compared to graphene ( $Y = 342.2$  N/m) or  $h$ -BN monolayer ( $Y = 275.8$  N/m)<sup>2</sup>,  $\text{MOX}_2$  monolayers have quite low Young's modulus, indicating their flexibility. Note that anisotropic  $Y$  and  $\nu$  of  $\text{MOX}_2$  monolayers are quite comparable with those of piezoelectric Janus monolayers like  $\text{TiSe}_2$ <sup>1</sup>.

|             | $e_{11}^{elc}$ | $e_{11}^{ion}$ | $e_{11}$ | $e_{12}^{elc}$ | $e_{12}^{ion}$ | $e_{12}$ | $C_{11}$ | $C_{22}$ | $C_{12}$ | $C_{66}$ | $d_{11}$ | $d_{12}$ |
|-------------|----------------|----------------|----------|----------------|----------------|----------|----------|----------|----------|----------|----------|----------|
| $U_{eff}=0$ | 4.217          | 11.937         | 16.153   | 2.974          | -0.824         | 2.150    | 54.694   | 50.240   | 7.528    | 17.176   | 29.555   | -0.149   |
| $U_{eff}=1$ | 4.153          | 14.335         | 18.488   | 2.894          | -0.801         | 2.094    | 61.061   | 49.736   | 7.942    | 17.201   | 30.362   | -0.639   |
| $U_{eff}=2$ | 4.084          | 17.011         | 21.095   | 2.767          | -1.695         | 1.072    | 66.124   | 49.097   | 7.976    | 17.255   | 32.271   | -3.059   |
| $U_{eff}=3$ | 4.033          | 22.373         | 26.406   | 2.609          | -1.403         | 1.206    | 71.882   | 48.413   | 8.103    | 17.342   | 37.155   | -3.728   |

Table S2 The electronic ( $e_{11}^{elc}$  and  $e_{12}^{elc}$ ) and ionic ( $e_{11}^{ion}$  and  $e_{12}^{ion}$ ) part of the total piezoelectric stress constant  $e_{11}$  and  $e_{12}$  in 2D piezoelectric unit of  $10^{-10}$  C/m, elastic constants ( $C_{11}$ ,  $C_{22}$ ,  $C_{12}$ , and  $C_{66}$ ) in 2D unit of N/m, and piezoelectric strain coefficients ( $d_{11}$  and  $d_{12}$ ) in pm/V of  $VOBr_2$ (FM) monolayers obtained using different value of  $U_{eff}$  ranging from 1 eV to 3 eV in GGA+ $U_{eff}$  calculations<sup>3</sup>.

|          | $a$ (Å)      | $b$ (Å)      | M-O (Å)      | M-X (Å)      | $Z_{11}$ (M)  | $Z_{11}$ (O)    | $Z_{11}$ (X)   | $P_1$   | $\Delta E$ | $i\omega_{\Gamma}$ |
|----------|--------------|--------------|--------------|--------------|---------------|-----------------|----------------|---------|------------|--------------------|
| $VOCl_2$ | 3.783(3.609) | 3.368(3.411) | 1.650(1.804) | 2.382(2.394) | 4.788(15.308) | -4.138(-12.955) | -0.325(-1.176) | 313.251 | 131.204    | 402.812            |
| $VOBr_2$ | 3.771(3.619) | 3.579(3.616) | 1.661(1.810) | 2.542(2.554) | 4.951(15.056) | -4.497(-13.122) | -0.227(-0.967) | 273.428 | 91.349     | 315.617            |

Table S3 Structural information of  $VOCl_2$ (AFM3) and  $VOBr_2$ (AFM3) monolayers: optimized lattice parameters ( $a$  and  $b$  are normalized to unit cell; see the rectangular  $2 \times 2 \times 1$  supercell for AFM3 in Fig. 1 (c)). M-O (M-X) represents the bond length between metal (M) and oxygen (halogen; X) atoms.  $Z_{11}$  is the Born effective charge in  $|e|$  unit. The values in the parentheses are for paraelectric phases.  $P_1$  ( $10^{-12}$  C/m) and  $\Delta E$  (meV/fu) are the in-plane electric polarization and energy difference between ferroelectric and paraelectric phase (positive  $\Delta E$  value suggests FE phase is lower in energy compared to PE).  $i\omega_{\Gamma}$ ( $cm^{-1}$ ) stands for the lowest imaginary frequency of PE phase at the  $\Gamma$ -point.

|                 | $e_{11}^{elc}$ | $e_{11}^{ion}$ | $e_{11}$ | $e_{12}^{elc}$ | $e_{12}^{ion}$ | $e_{12}$ | $C_{11}$ | $C_{22}$ | $C_{12}$ | $C_{66}$ | $d_{11}$ | $d_{12}$ |
|-----------------|----------------|----------------|----------|----------------|----------------|----------|----------|----------|----------|----------|----------|----------|
| $VOCl_2$ (AFM3) | 4.725          | 11.288         | 16.013   | 3.319          | -0.609         | 2.710    | 51.377   | 42.763   | 6.990    | 18.688   | 30.994   | 1.271    |
| $VOBr_2$ (AFM3) | 4.388          | 11.956         | 16.344   | 2.960          | -0.585         | 2.375    | 53.918   | 40.737   | 6.328    | 17.129   | 30.180   | 1.142    |

Table S4 Piezoelectric constants of  $VOCl_2$ (AFM3) and  $VOBr_2$ (AFM3) monolayers: the electronic ( $e_{11}^{elc}$  and  $e_{12}^{elc}$ ) and ionic ( $e_{11}^{ion}$  and  $e_{12}^{ion}$ ) part of the total piezoelectric stress constant  $e_{11}$  and  $e_{12}$  in 2D piezoelectric unit of  $10^{-10}$  C/m, elastic constants ( $C_{11}$ ,  $C_{22}$ ,  $C_{12}$ , and  $C_{66}$ ) in 2D unit of N/m, and piezoelectric strain coefficients ( $d_{11}$  and  $d_{12}$ ) in pm/V.
